# Supplementary material
Source: PubMed Central journal article supplement (PMC8407368)
Supplement: NIHMS1719649-supplement-Supplementary_Material.pdf [file NIHMS1719649-supplement-Supplementary_Material.pdf]

**Current Biology, Volume 31**

## **Supplemental Information**

### **Human Responses to Visually Evoked Threat**

**Melis Yilmaz Balban, Erin Cafaro, Lauren Saue-Fletcher, Marlon J. Washington, Maryam Bijanzadeh, A. Moses Lee, Edward F. Chang, and Andrew D. Huberman**

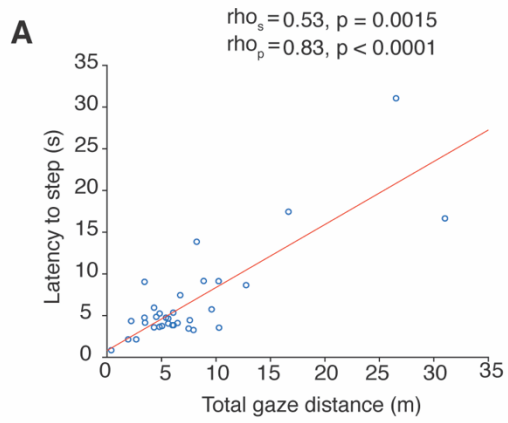

**B** Linear regression model:  
 $y \sim 1 + x_1 + x_2$   
 $x_1$  = change in SCL in response to heights  
 $x_2$  = total gaze distance (m)

Estimated Coefficients:

|             | Estimate   | SE        | tStat    | pValue     |
|-------------|------------|-----------|----------|------------|
| (Intercept) | -0.18018   | 0.93386   | -0.19294 | 0.84835    |
| $x_1$       | 0.18189    | 0.067042  | 2.713    | 0.011099   |
| $x_2$       | 0.00071293 | 8.619e-05 | 8.2716   | 4.0495e-09 |

Number of observations: 32, Error degrees of freedom: 29  
 Root Mean Squared Error: 3.06  
 R-squared: 0.748, Adjusted R-Squared 0.73  
 F-statistic vs. constant model: 43, p-value = 2.11e-09

**Figure S1 Increase in arousal and increase in visual scanning both contribute significantly to increased latency to step onto the plank, Related to Figure 1**

(A) Scatter plot showing the correlation between latency to step and totally scanning distance.  $\rho_s$  = Spearman correlation coefficient.  $\rho_p$  = Pearson correlation coefficient. (B) Generalized linear model statistics that predict latency from a combination of change in SCL and total gaze distance.

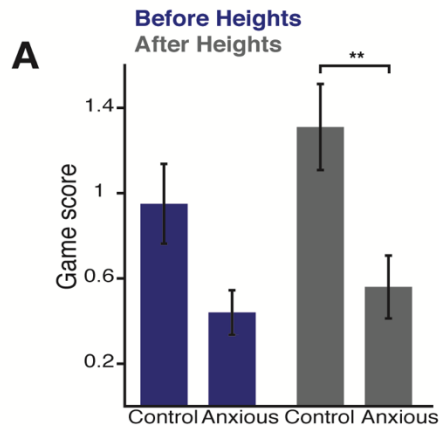

**Figure S2 Anxious subjects score lower on the cognitive game than healthy controls after heights exposure, Related to Figure 3**

(A) Game score = number of boards completed.  $p = 0.01$ , unpaired 2-sided t-test. Error bars = S.E.M. See also Table S2.

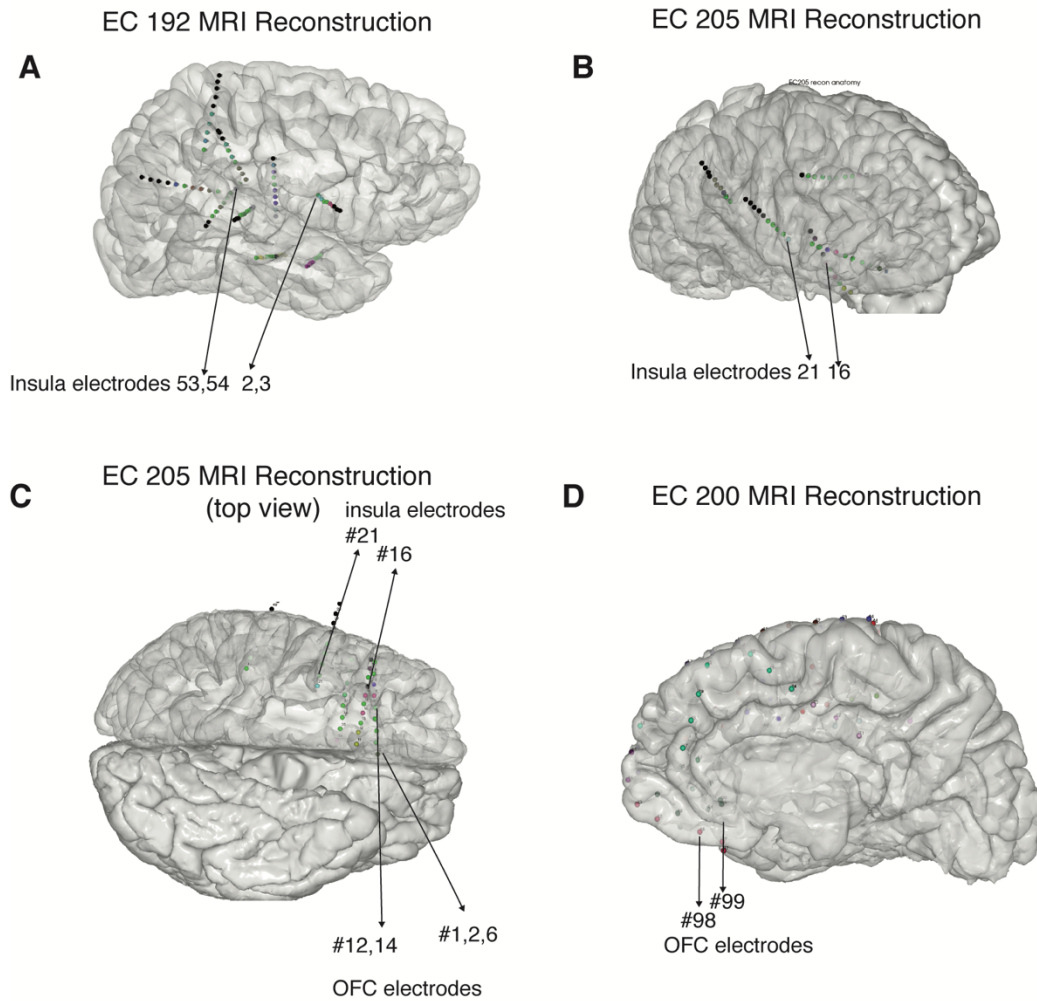

**Figure S3 MRI reconstructions with electrode locations from individual epilepsy patients, Related to Figures 5, 6 and 7**

Locations of insula and OFC electrodes shown for patient EC 192 (A) and EC 205 (B) and (C) and EC 200 (D).

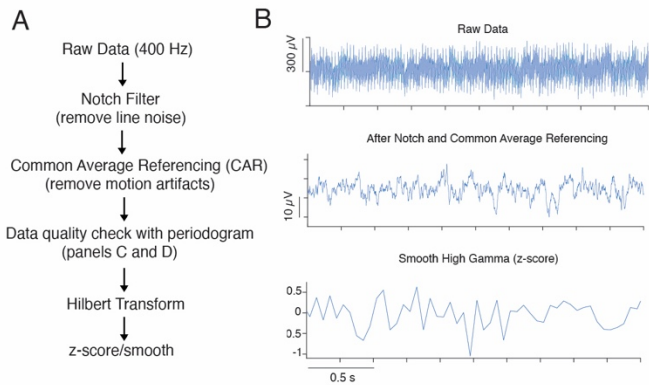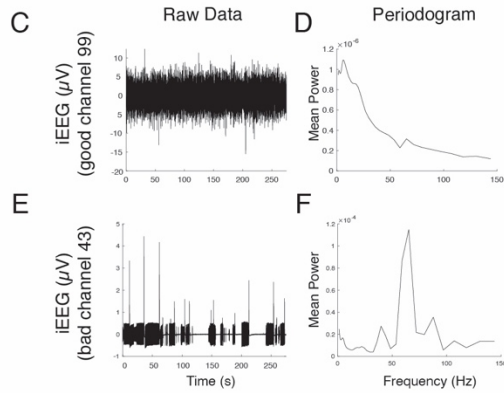

**G** Example channels and respective periodograms from all leads included in the analysis (Heights)

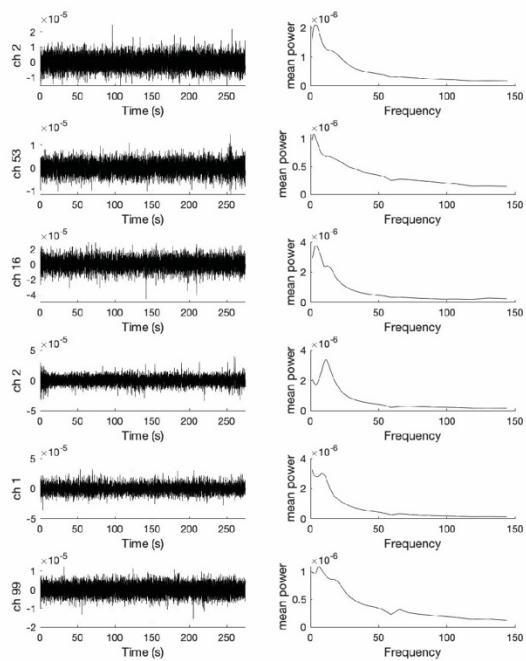

**H** Example channels and respective periodograms from all leads included in the analysis (No Heights)

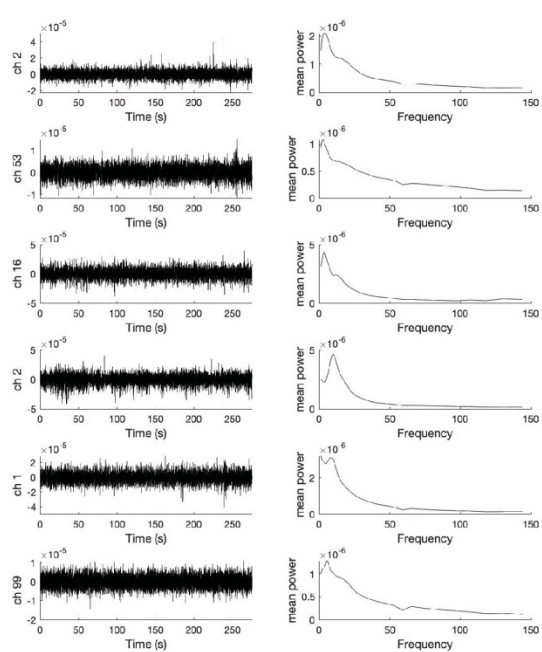

**Figure S4 iEEG processing steps for quality control and example periodograms for all included electrode leads, Related to Figures 5, 6 and 7**

(A) iEEG data preprocessing steps from raw data to the high gamma signal that gets correlated with the skin response. (B) Example iEEG traces: raw data (top), after notch filtering and common average referencing (middle), smoothed and z-scored high gamma signal (bottom). (C) Examples of raw data from a channel with good data quality (C) and bad data quality (E), and their respective periodograms (D) and (F) showing mean power plotted for each frequency band (5 Hz bins). iEEG traces after common average referencing from one example electrode from each lead during heights (G) and no heights (H) conditions and their respective periodograms.

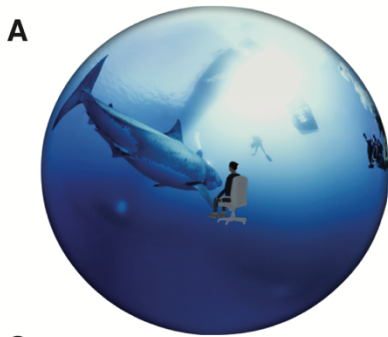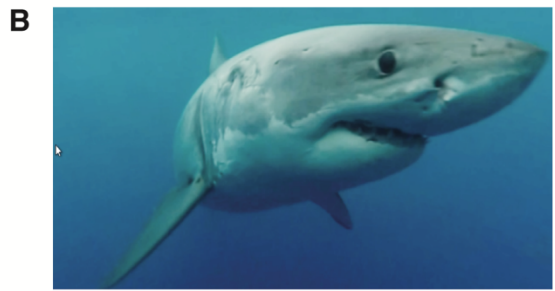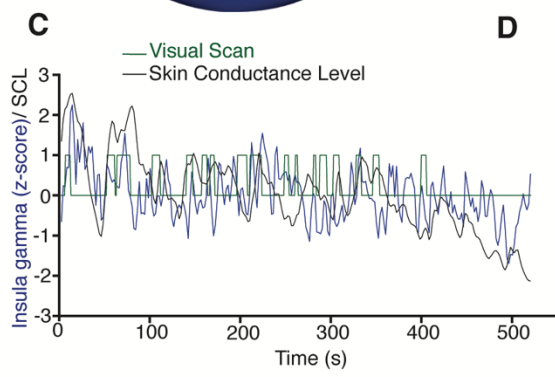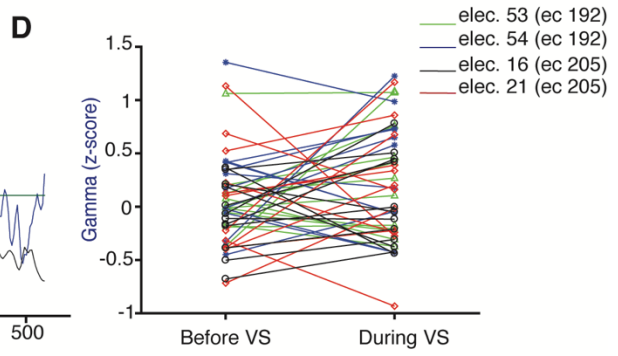



**Figure S5 Insula gamma correlates with skin conductance during the 360 shark movie,  
Related to Figures 5 and 7**

(A) An illustration showing the position of the viewer of the 360 shark movie in relationship to the movie which is presented on the inner surface of a virtual sphere. (B) A screen shot from the shark movie. (C) Gamma activity from one electrode (21, EC 205) from the insula superimposed with skin conductance level (SCL) and visual scanning episodes (red) during the sharks stimulus. (D) Gamma activity before and during each visual scanning episode during the shark stimulus. Each line represents data from one electrode during a visual scan. See also Table S2.

| Information               | Heights        |                 | No Heights      |                | Modified Heights Stimulus |        |        |
|---------------------------|----------------|-----------------|-----------------|----------------|---------------------------|--------|--------|
|                           | Healthy        | Anxious         | Healthy         | Anxious        | 192                       | 200    | 205    |
| Gender (F, M)             | 29, 22         | 27, 10          | 20, 22          | 13, 8          | M                         | M      | F      |
| Age                       | 35 ± 14        | 36 ± 15         | 32 ± 13         | 36 ± 2         | 33                        | 23     | 44     |
| STAI Score (State, Trait) | 26 ± 5, 31 ± 7 | 39 ± 9, 50 ± 11 | 27 ± 5, 33 ± 11 | 36 ± 2, 49 ± 3 | 50, 66                    | 22, 27 | 24, 26 |
| GAD-7 Score               | 3 ± 3          | 12 ± 4          | 3 ± 2           | 13 ± 1         | 19                        | 3      | 12     |

**Table S1 Subject information, Related to STAR Methods**

- All values for Heights and No Heights are mean ± s.e.m.

| Figure | Population/Stimulus/Measure                                               | n       | Mean         | Median       | S.e.m.     | Test            | p - value  |
|--------|---------------------------------------------------------------------------|---------|--------------|--------------|------------|-----------------|------------|
| 1 E    | Healthy / Heights / SCL before and after (z-score)                        | 40      | 7.45         | 4.61         | 1.31       | Paired t-test   | p < 0.0001 |
| 1 F    | Healthy / Heights / HR before and after (z-score)                         | 35      | 0.84         | 0.75         | 0.23       | Paired t-test   | p = 0.0077 |
| 1 G    | Healthy / Heights / Tidal Volume before and after (z-score)               | 34      | 5.59         | 3.92         | 1.53       | Paired t-test   | p = 0.0009 |
| 1 J    | Healthy / Heights / # of visual scans                                     | 34      | 2.65         | 2            | 0.33       | N/A             | N/A        |
| 1 K    | Healthy / Heights / scan distance (m)                                     | 90      | 1.57         | 1.15         | 0.13       | N/A             | N/A        |
| 2 D    | Healthy / Heights vs No Heights / SCL (z-score)                           | 40,32   | 7.45, 1.85   | 4.61, 1.85   | 1.30, 0.35 | Unpaired t-test | p < 0.0001 |
| 2 E    | Healthy / Heights vs No Heights / Duration of SCR (s)                     | 40,32   | 20.78, 8.76  | 13.85, 9.30  | 2.46, 0.88 | Unpaired t-test | p < 0.0001 |
| Text   | Healthy / Heights vs No Heights / Heart Rate (z-score)                    | 35, 39  | 0.84, 0.43   | 0.75, 0.22   | 0.30, 0.23 | Unpaired t-test | p = 0.54   |
| Text   | Healthy / Heights vs No Heights / Tidal Volume (z-score)                  | 34,27   | 5.59, 5.01   | 3.92, 4.31   | 1.55, 0.91 | Unpaired t-test | p = 0.76   |
| 2 F    | Healthy / No Heights vs Heights / Total scanning distance (m)             | 40,34   | 3.64, 7.47   | 2.55, 5.85   | 0.84, 1.09 | Unpaired t-test | p = 0.0061 |
| 2 G    | Healthy / No Heights vs Heights / # of scans per subject                  | 40,34   | 1.53, 2.65   | 1,2          | 0.28, 0.33 | Unpaired t-test | p = 0.01   |
| 2 H    | Healthy / No Heights vs Heights / Avg. distance per each scan (m)         | 61, 90  | 1.65, 1.57   | 1.34, 1.15   | 0.19, 0.13 | Unpaired t-test | p = 0.73   |
| 2 I    | Healthy / No Heights vs Heights / Subjective 'scary' rating               | 38,40   | 2.18, 3.23   | 1, 2         | 0.12, 0.18 | Unpaired t-test | p < 0.0001 |
| 2 I    | Healthy / No Heights vs Heights / Subjective 'real' rating                | 38, 40  | 3.29, 3.26   | 3, 3         | 0.15, 0.13 | Unpaired t-test | p = 0.75   |
| 2 J    | Healthy / No Heights vs Heights / Latency to step to plank (s)            | 51, 42  | 6.34, 2.31   | 4.70, 2.10   | 0.72, 0.20 | Unpaired t-test | p < 0.0001 |
| 2 K    | Healthy / No Heights vs Heights / %time scanning away from the plank      | 40, 34  | 86%, 82%     | 90%, 86%     | 2.8%,2.8%  | Unpaired t-test | p = 0.32   |
| 3 C    | Healthy control vs Anxious / Before Baseline / Number of SCRs             | 32, 30  | 1.51, 2.18   | 1.43, 2.15   | 0.19, 0.23 | Unpaired t-test | p = 0.028  |
| 3 D    | Healthy control vs Anxious / Heights SCL change (z-score)                 | 40, 24  | 7.45, 12.86  | 4.61, 5.55   | 1.26, 5.58 | Unpaired t-test | p = 0.24   |
| 3 E    | Healthy control vs Anxious / Heights SCR duration (s)                     | 40, 24  | 20.78, 31.07 | 13.85, 18.79 | 2.45, 7.24 | Unpaired t-test | p = 0.11   |
| 3 H    | Healthy control vs Anxious / Heights Total scanning distance (m)          | 34, 33  | 7.46, 13.85  | 5.85, 9.43   | 1.09, 2.51 | Unpaired t-test | p = 0.021  |
| 3 H    | Healthy control vs Anxious / No Heights/ Total scanning distance (m)      | 40, 21  | 3.64, 3.66   | 2.55, 3.19   | 0.84, 0.49 | Unpaired t-test | p = 0.99   |
| 3 H    | Healthy control vs Anxious / VR intro/ Total scanning distance (m)        | 33, 30  | 6.15, 5.07   | 5.45, 4.88   | 0.82, 0.72 | Unpaired t-test | p = 0.33   |
| 3 I    | Healthy control vs Anxious / Heights # of scans per subject               | 34, 33  | 2.65, 5.37   | 2, 4         | 0.32, 0.75 | Unpaired t-test | p = 0.0018 |
| 3 I    | Healthy control vs Anxious / No Heights /# of scans per subject           | 40, 21  | 1.53, 1.76   | 1, 2         | 0.78, 0.21 | Unpaired t-test | p = 0.57   |
| 3 I    | Healthy control vs Anxious / VR intro/ # of visual scans per subject      | 33, 30  | 2.13, 1.64   | 2, 1         | 0.32, 0.23 | Unpaired t-test | p = 0.2124 |
| 3 J    | Healthy control vs Anxious / Heights Avg. scan distance for each scan (m) | 90, 181 | 1.57, 1.31   | 1.54, 1.05   | 0.14, 0.67 | Unpaired t-test | p = 0.04   |
| 3 J    | Healthy control vs Anxious / No Heights /Avg. scan distance for           | 61, 37  | 1.65, 1.18   | 1.34, 1.19   | 0.19, 0.13 | Unpaired t-test | p = 0.08   |

|       |                                                                                                  |        |             |                |             |                                             |            |
|-------|--------------------------------------------------------------------------------------------------|--------|-------------|----------------|-------------|---------------------------------------------|------------|
|       | each scan (m)                                                                                    |        |             |                |             |                                             |            |
| 3 J   | Healthy control vs Anxious / VR intro/<br>Avg. scan distance (m)                                 | 69, 54 | 1.20, 1.17  | 0.80, 0.91     | 0.15, 0.12  | Unpaired<br>t-test                          | p = 0.85   |
| 3 K   | Healthy control vs Anxious / Heights/<br>% time scanning away from the plank                     | 34, 33 | 82%, 85%    | 86%, 85%       | 2.7 %, 1.4  | Unpaired<br>t-test                          | p = 0.39   |
| 3 M   | Healthy control vs Anxious / No<br>Heights/Latency to step onto the<br>Plank (s)                 | 51, 37 | 6.34, 13.1  | 4.7, 8.4       | 0.72, 2. 28 | Unpaired<br>t-test                          | p = 0.002  |
| 3 O   | Healthy control vs Anxious / Heights<br>Subjective "scary" rating (1-5)                          | 40, 36 | 2.17, 2.64  | 2, 2           | 0.18, 0.20  | Unpaired<br>t-test                          | p = 0.08   |
| 3 O   | Healthy control vs Anxious / Heights<br>Subjective "real" rating (1-5)                           | 40, 36 | 3.24, 3.06  | 3, 3           | 0.2, 0.13   | Unpaired<br>t-test                          | p = 0.48   |
| 4 A   | Control Male vs Anxious Male / Heights<br>Latency to step (s)                                    | 22, 10 | 5.50, 6.91  | 4.70, 5.20     | 0.62, 1.28  | Unpaired<br>t-test                          | p = 0.27   |
| 4 A   | Control Female vs Anxious Female /<br>Latency to step (s)                                        | 29, 27 | 6.98, 15.40 | 4.60, 9.10     | 1.18, 2.99  | Unpaired<br>t-test                          | p = 0.009  |
| 4 B   | Control Male vs Anxious Male / Heights<br>Total gaze distance (m)                                | 16, 9  | 6.11, 9.05  | 6.08, 7.44     | 0.73, 1.52  | Unpaired<br>t-test                          | p = 0.06   |
| 4 B   | Control Female vs Anxious Female /<br>Total gaze distance (m)                                    | 18, 24 | 8.67, 15.66 | 5.66,<br>9.93  | 1.94, 3.36  | Unpaired<br>t-test                          | p = 0.11   |
| S2 A  | Control vs Anxious / Before Heights<br>Cognitive game score                                      | 39, 34 | 0.95, 0.42  | 0,0            | 0.19, 0.11  | Unpaired<br>Wilcoxon<br>Signed rank<br>test | p = 0.083  |
| S2 A  | Control vs Anxious / After Heights<br>Cognitive game score                                       | 39, 34 | 1.31, 0.58  | 0,1            | 0.20, 0.15  | Unpaired<br>Wilcoxon<br>Signed rank<br>test | p = 0.01   |
| 7 C   | Mean insula high gamma activity<br>Before and during<br>visual scans/ heights stimulus (z-score) | 16     | -0.32, 0.57 | -0.32, 0.52    | 0.05, 0.19  | Paired t-test                               | p < 0.0001 |
| S 5 D | Mean insula high gamma activity<br>before and during<br>visual scan (z-score)/sharks             | 48     | 0.09, 0.19  | -0.01,<br>0.13 | 0.07, 0.07  | Paired t-test                               | p = 0.29   |

**Table S2 Descriptive statistics and statistical tests, Related to Figures 1 – 4, 7, S2, S5 and STAR Methods.**

| Subject ID | GAD-7 | Trait Anxiety | Medication                                  | Gender | Age | Co-morbidity                                                                                 |
|------------|-------|---------------|---------------------------------------------|--------|-----|----------------------------------------------------------------------------------------------|
| s14        | NA    | 48            | None                                        | M      | 25  | None                                                                                         |
| s53        | 20    | 51            | Yes / no name                               | F      | 71  | Current depression, anxiety                                                                  |
| s60        | 14    | 47            | None                                        | M      | 28  | Arachnophobia                                                                                |
| s61        | 10    | 44            | None                                        | F      | 25  | Current GAD, depression, shark phobia, arachnophobia, claustrophobia                         |
| s66        | 9     | 48            | No                                          | F      | 19  | None                                                                                         |
| s81        | 20    | 47            | None                                        | F      | 59  | Claustrophobia                                                                               |
| s83        | 10    | 32            | None                                        | F      | 25  | Shark phobia, arachnophobia. Past anxiety, depression, PTSD                                  |
| s93        | 10    | 52            | Amlodipine besylate -5 mg                   | M      | 54  | Current depression, shark phobia                                                             |
| s112       | 15    | 38            | None                                        | F      | 23  | Current anxiety (GAD), emetophobia, arachnophobia                                            |
| s116       | 10    | 62            | Prozac                                      | F      | 35  | Past anxiety. Shark, sharp objects, snakes, airplane phobias                                 |
| s125       | 16    | 66            | None                                        | F      | 26  | Current anxiety and depression. Arachnophobia, claustrophobia                                |
| s129       | 15    | 52            | None                                        | F      | 19  | Current anxiety (Panic disorder, SAD). Past depression, shark, snake phobia, arachnophobia   |
| s143       | 8     | 59            | Wellbutrin-75mg daily<br>Zoloft-100mg daily | F      | 43  | Current depression and PTSD, arachnophobia. Past anxiety (GAD, panic disorder) and addiction |
| s150       | 12    | 42            | Lorazepam-0.5 mg and as needed              | F      | 38  | Current anxiety (panic disorder), depression, arachnophobia.                                 |
| S162       | 13    | 52            | None                                        | F      | 42  | Snake phobia, shark phobia                                                                   |
| s170       | 13    | 40            | None                                        | M      | 27  | None                                                                                         |
| s174       | 10    | 41            | None                                        | F      | 22  | Arachnophobia, snakes phobia                                                                 |
| s187       | 18    | 63            | None                                        | F      | 23  | Current anxiety                                                                              |
| s194       | 10    | 44            | None                                        | F      | 20  | Current depression, anxiety (social anxiety), arachnophobia                                  |
| s198       | 3     | 46            | Ambien-5mg                                  | F      | 65  | Current depression, past PTSD                                                                |
| s203       | 3     | 39            | Yes / no name                               | M      | 36  | None                                                                                         |
| s209       | 19    | 62            | None                                        | F      | 54  | Current depression, anxiety, PTSD                                                            |
| s224       | 8     | 46            | Cymbalta-60 m                               | F      | 55  | Current depression and anxiety. GAD and SAD. Airplane phobia                                 |
| s233       | 13    | 51            | Paxil-50mg,<br>Wellbutrin-50mg              | M      | 33  | Current anxiety, depression, PTSD, shark phobia, arachnophobia                               |
| s234       | 12    | 64            | None                                        | F      | 31  | Current anxiety (GAD)                                                                        |
| s237       | 15    | 25            | None                                        | F      | 50  | Current anxiety (GAD), PTSD, snake phobia, past depression.                                  |
| S240       |       | 75            | Lexapro-30 mg<br>Mirtazipine-15mg           | F      | 24  | Current anxiety (panic, social, agoraphobia)                                                 |
| s241       | 9     | 60            | Zoloft-200 mg,<br>Wellbutrin-300mg          | F      | 19  | Current depression and anxiety (GAD)                                                         |
| s251       | 10    | 52            | Vyvanse-40mg,<br>Bubopriion-300 mg          | M      | 50  | Current depression, anxiety, phobia (nonspecific)                                            |
| s255       | 5     | 57            | None                                        | F      | 50  | Claustrophobia, airplane phobia                                                              |

|      |    |    |               |   |    |                                                   |
|------|----|----|---------------|---|----|---------------------------------------------------|
| s257 | 11 | 51 | None          | M | 34 | Current anxiety, social anxiety. Past depression  |
| s265 | 7  | 62 | None          | M | 55 | Current depression, snake phobia                  |
| s266 | 11 | 51 | None          | F | 39 | Shark phobia, adjustment disorder                 |
| s268 | 13 | 59 | None          | F | 26 | None                                              |
| s269 | 19 | 55 | None          | M | 51 | Arachnophobia, migraine                           |
| s270 | 15 | 62 | None          | F | 21 | None                                              |
| s273 | 5  | 46 | None          | F | 25 | None                                              |
| s274 | 21 | 68 | Yes / no name | M | 20 | Shark object, snake, shark phobia, claustrophobia |

**Table S3 Self-reported comorbidity and medication status of anxious subjects, Related to Figure 3**

| Insula     |            | No Heights                 |                         | Heights                    |                            |
|------------|------------|----------------------------|-------------------------|----------------------------|----------------------------|
| Subject    |            | 192                        | 205                     | 192                        | 205                        |
|            | Theta      | <b>-0.153 p = 0.019</b>    | 0.08 p = 0.363          | <b>0.274 p &lt; 0.001</b>  | 0.091 p = 0.342            |
|            | Alpha      | -0.085 p = 0.195           | 0.057 p = 0.533         | 0.132 p = 0.057            | 0.143 p = 0.134            |
|            | Beta       | -0.073 p = 0.270           | -0.034 p = 0.707        | 0.005 p = 0.942            | 0.003 p = 0.976            |
|            | Low gamma  | -0.013 p = 0.841           | -0.131 p = 0.149        | <b>0.202 p = 0.002</b>     | 0.179 p = 0.059            |
|            | High gamma | 0.078 p = 0.236            | <b>-0.193 p = 0.032</b> | <b>0.467 p &lt; 0.001</b>  | <b>0.304 p = 0.001</b>     |
| <b>OFC</b> |            |                            |                         |                            |                            |
| Subject    |            | 200                        | 205                     | 200                        | 205                        |
|            | Theta      | -0.134 p = 0.143           | <b>0.158 p = 0.005</b>  | <b>-0.364 p &lt; 0.001</b> | <b>-0.189 p &lt; 0.001</b> |
|            | Alpha      | <b>-0.203 p = 0.025</b>    | 0.086 p = 0.131         | -0.131 p = 0.177           | <b>-0.151 p = 0.012</b>    |
|            | Beta       | -0.104 p = 0.253           | 0.042 p = 0.456         | 0.155 p = 0.111            | 0.083 p = 0.166            |
|            | Low gamma  | <b>-0.219 p = 0.015</b>    | -0.049 p = 0.383        | 0.052 p = 0.595            | <b>0.262 p &lt; 0.001</b>  |
|            | High gamma | <b>-0.338 p &lt; 0.001</b> | -0.105 p = 0.066        | 0.137 p = 0.156            | <b>0.267 p &lt; 0.001</b>  |

**Table S4 Spearman correlations and significance during the modified Heights and No Heights Stimuli, Related to Figures 5 and 6**

**Significant correlations are in bold.**
